# Supplementary material
Source: PubMed Central journal article supplement (PMC2937077)
Supplement: NIHMS211725-supplement-01.pdf [file NIHMS211725-supplement-01.pdf]

142 **Appendix A**

143

144 Each of the 12 segments of the subject was assumed to be a rigid segment and modeled  
 145 accordingly. The equations that governed the system are show in equation 1.

$$\begin{aligned}
 146 \quad \vec{F}_{contact} + \vec{F}_{distance} + \vec{F}_{inertia} &= \vec{0} \\
 \vec{M}_{contact} + \vec{M}_{distance} + \vec{M}_{inertia} &= \vec{0}
 \end{aligned} \tag{1}$$

147 Here,  $\vec{F}$  is a force vector acting on a segment and  $\vec{M}$  is the moment vector acting on a  
 148 segment. The subscripts denote the type of force or moment as being either *contact*,  
 149 *distance*, or *inertia* which describes forces or moments due to contact, gravity, and  
 150 inertial forces respectively. The inertial forces are further expanded in equation 2 as:

$$\begin{aligned}
 151 \quad \vec{F}_{inertia} &= -m \cdot \vec{a} \\
 \vec{M}_{inertia}^{COM} &= \mathbf{R}^{-1} \cdot (-\mathbf{R} \cdot \vec{\alpha} \cdot \mathbf{I} - (\mathbf{R} \cdot \vec{\omega}) \times (\mathbf{I} \cdot \mathbf{R} \cdot \vec{\omega}))
 \end{aligned} \tag{2}$$

152 In equation 2, the inertial moment is taken about the center-of-mass (COM).  $\mathbf{R}$  is the  
 153 rotation matrix, which describes the segment in the lab reference frame, and  $\mathbf{I}$  is the  
 154 inertial matrix in the segment reference frame. Since the inertial matrix dotted with the  
 155 rotation matrix generally results in a matrix with non-zero diagonal terms, rotational  
 156 dynamic coupling is possible. The mass of the segment is defined by  $m$  and the angular  
 157 acceleration and velocity of the segment with respect to the lab reference frame is defined  
 158 by  $\vec{\alpha}$  and  $\vec{\omega}$  respectively. The inertial moments acting on the segment can be expressed  
 159 about any point,  $O$ , in the lab using equation 3.

$$160 \quad \vec{M}_{inertia}^O = \vec{p}^{O/COM} \times \vec{F}_{inertia} + M_{inertia}^{COM} \tag{3}$$

161 In equation 3,  $\bar{p}^{O/COM}$  is the vector from point  $O$  in the lab to the COM of the segment,  
 162 which is necessary to ensure that summation of the contact, distance, and inertial  
 163 moments occur about the same point with respect to the same reference frame.

164 Equations 1, 2, and 3 can be applied to any body or group of bodies which are selected as  
 165 the free body in question.

166 In order to establish the trunk angular acceleration as a function of the lower extremity  
 167 joint moments, joint constraints are applied to the ankle, knee, and hip. The equation used  
 168 to do so is given by equation 4.

$$169 \quad \bar{a}_D - \bar{a}_P + \bar{\alpha}_d \times \bar{p}_d + \bar{\alpha}_p \times \bar{p}_p + \bar{\omega}_d \times (\bar{\omega}_d \times \bar{p}_d) + \bar{\omega}_p \times (\bar{\omega}_p \times \bar{p}_p) = \bar{0} \quad (4)$$

170 Equation 4 relates the acceleration of the distal and proximal segment to one another  
 171 since they are connected by a ball and socket joint.  $\bar{p}_d$  and  $\bar{p}_p$  are the vectors from a  
 172 point  $O$  in the lab to the COM of the distal and proximal segments, respectively. It is  
 173 assumed that the moment acting on the proximal end of the distal segment is equal and  
 174 opposite to the moment acting on the distal end of the proximal segment.

175 The moments acting at the proximal end of each segment (at each joint) are given by the  
 176 equations (5).

$$177 \quad \begin{aligned} \bar{M}_{contact}^F &= -\left(\bar{p}^{F_{COM}} \times (-m_F \cdot \bar{a}_F) + \mathbf{R}_F^{-1} \cdot (-(\mathbf{R}_F \cdot \bar{\alpha}_F) \cdot \mathbf{I}_F - (\mathbf{R}_F \cdot \bar{\omega}_F) \times \mathbf{I}_F \cdot (\mathbf{R}_F \cdot \bar{\omega}_F))\right) - \bar{p}^{F_{COM}} \times (m_F \cdot \bar{g}) - COP \times GRF - GRM \\ \bar{M}_{contact}^S &= -\left(\bar{p}^{S_{COM}} \times (-m_S \cdot \bar{a}_S) + \mathbf{R}_S^{-1} \cdot (-(\mathbf{R}_S \cdot \bar{\alpha}_S) \cdot \mathbf{I}_S - (\mathbf{R}_S \cdot \bar{\omega}_S) \times \mathbf{I}_S \cdot (\mathbf{R}_S \cdot \bar{\omega}_S))\right) - \bar{p}^{S_{COM}} \times (m_S \cdot \bar{g}) + \bar{M}_{contact}^F \\ \bar{M}_{contact}^T &= -\left(\bar{p}^{T_{COM}} \times (-m_T \cdot \bar{a}_T) + \mathbf{R}_T^{-1} \cdot (-(\mathbf{R}_T \cdot \bar{\alpha}_T) \cdot \mathbf{I}_T - (\mathbf{R}_T \cdot \bar{\omega}_T) \times \mathbf{I}_T \cdot (\mathbf{R}_T \cdot \bar{\omega}_T))\right) - \bar{p}^{T_{COM}} \times (m_T \cdot \bar{g}) + \bar{M}_{contact}^S \end{aligned} \quad (5)$$

178 Similarly the forces acting on the proximal end of each segment are given by equation 6.

$$179 \quad \begin{aligned} \bar{F}_{contact}^F &= -m_F \cdot \bar{a}_F - m_F \cdot \bar{g} - GRF \\ \bar{F}_{contact}^S &= -m_S \cdot \bar{a}_S - m_S \cdot \bar{g} + \bar{F}_{contact}^F \\ \bar{F}_{contact}^T &= -m_T \cdot \bar{a}_T - m_T \cdot \bar{g} + \bar{F}_{contact}^S \end{aligned} \quad (6)$$

180 In the equations 5 and 6 the subscripts  $F$ ,  $S$ , and  $T$  reflect the foot, shank, and thigh  
 181 segments, respectively. The above equations of motion can be linearly parameterized into  
 182 equation 7 which reflects the trunk angular acceleration as a function of the joint  
 183 moments.

$$184 \begin{bmatrix} S_{11} & S_{12} & S_{13} & S_{14} & S_{15} & S_{16} & S_{17} & S_{18} & S_{19} \\ S_{21} & S_{22} & S_{23} & S_{24} & S_{25} & S_{26} & S_{27} & S_{28} & S_{29} \\ S_{31} & S_{32} & S_{33} & S_{34} & S_{35} & S_{36} & S_{37} & S_{38} & S_{39} \end{bmatrix} \cdot \begin{bmatrix} \bar{M}_A \\ \bar{M}_K \\ \bar{M}_H \end{bmatrix} + \begin{bmatrix} C_A \\ C_K \\ C_H \end{bmatrix} = \begin{bmatrix} \alpha_x \\ \alpha_y \\ \alpha_z \end{bmatrix} \quad (7)$$

185 For the sake of example, the moment equations for a three-dimensional inverted  
 186 pendulum is derived and linearly parameterized to express the angular acceleration of the  
 187 pendulum in terms of the moment at the pivot point. The moment equation for an  
 188 inverted pendulum is given as:

$$189 \bar{M}_{contact} + \bar{P} \times \bar{F}_{contact} - \bar{\alpha} \cdot \mathbf{I} - \bar{\omega} \times \mathbf{I} \cdot \bar{\omega} + \bar{P}_{com} \times (-m\bar{a}) + \bar{P}_{com} \times m\bar{g} = \bar{0} \quad (8)$$

190 This equation can be written in terms of its elements.

$$191 \mathbf{I}^{-1} \cdot \begin{bmatrix} M_x \\ M_y \\ M_z \end{bmatrix} + \mathbf{I}^{-1} \cdot \begin{bmatrix} 0 & -P_z & P_y \\ P_z & 0 & -P_x \\ -P_y & P_x & 0 \end{bmatrix} \cdot \begin{bmatrix} F_x \\ F_y \\ F_z \end{bmatrix} - \mathbf{I}^{-1} \cdot \begin{bmatrix} 0 & -\omega_z & \omega_y \\ \omega_z & 0 & -\omega_x \\ -\omega_y & \omega_x & 0 \end{bmatrix} \cdot \mathbf{I} \cdot \begin{bmatrix} \omega_x \\ \omega_y \\ \omega_z \end{bmatrix} + \dots \quad (9)$$

$$\dots + \mathbf{I}^{-1} \cdot \begin{bmatrix} 0 & -P_z & P_y \\ P_z & 0 & -P_x \\ -P_y & P_x & 0 \end{bmatrix}_{com} \cdot \begin{bmatrix} -m\bar{a}_x \\ -m\bar{a}_y \\ -m\bar{a}_z \end{bmatrix} + \mathbf{I}^{-1} \cdot \begin{bmatrix} 0 & -P_z & P_y \\ P_z & 0 & -P_x \\ -P_y & P_x & 0 \end{bmatrix}_{com} \cdot \begin{bmatrix} 0 \\ 0 \\ mg \end{bmatrix} = \begin{bmatrix} \alpha_x \\ \alpha_y \\ \alpha_z \end{bmatrix}$$

192 In equation 9, the angular acceleration's sensitivity to the contact moments are the  
 193 inverse of the inertia matrix in the laboratory reference frame for a given configuration of  
 194 the pendulum.

195 The sensitivity matrix  $S$  (equation 7) is a time varying matrix which is dependant on the  
 196 geometry of the model. The constant vector  $C$  is also dependant on the geometry of the  
 197 model and the scalars  $\alpha_x$ ,  $\alpha_y$ , and  $\alpha_z$  in equation 7 are the angular accelerations of the  
 198 trunk about the  $x$ ,  $y$  and  $z$  axes, respectively.
